# Supplementary material for: Root ethylene signalling is involved in Miscanthus sinensis growth promotion by the bacterial endophyte Herbaspirillum frisingense GSF30T
Source: PubMed Central journal article supplement (PMC3808336; doi:10.1093/jxb/ert276), 2013-09-16
Supplement: supp_ert276_jexbot103770_file001.pdf [file supp_ert276_jexbot103770_file001.pdf]

Supplementary information, including supporting figures:

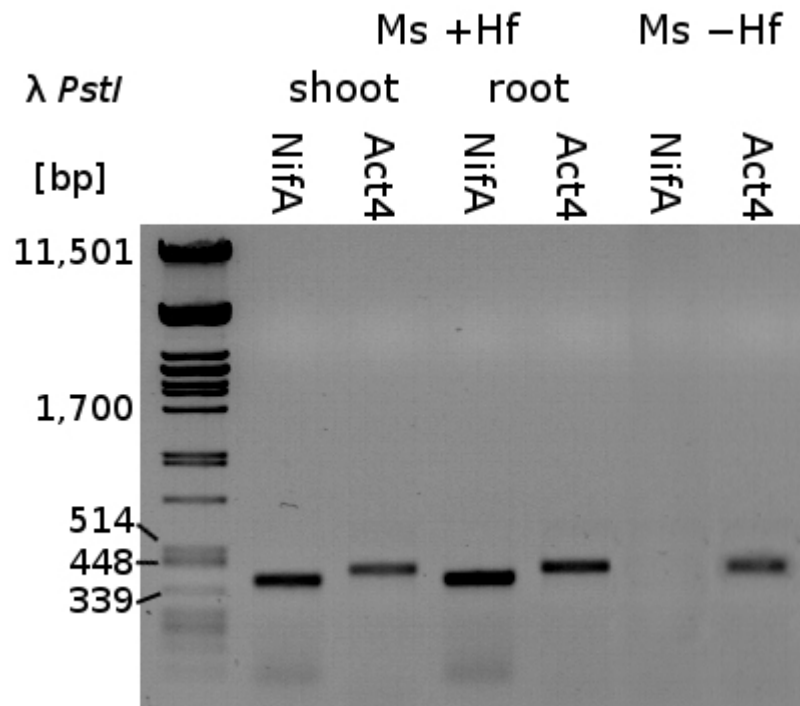

Suppl. Fig. S1: Exclusive detection of bacterial *H. frisingense* nitrogen fixation regulator *nifA* in inoculated plants by polymerase chain reaction. *H. frisingense* specific *NifA* gene was detected in roots and shoots of inoculated *Miscanthus sinensis*, but not in non-inoculated samples. *Act4* was amplified for quality verification of DNA-samples. *NifA*: nitrogen fixation regulator *NifA*, *Act4*: Actin-4.

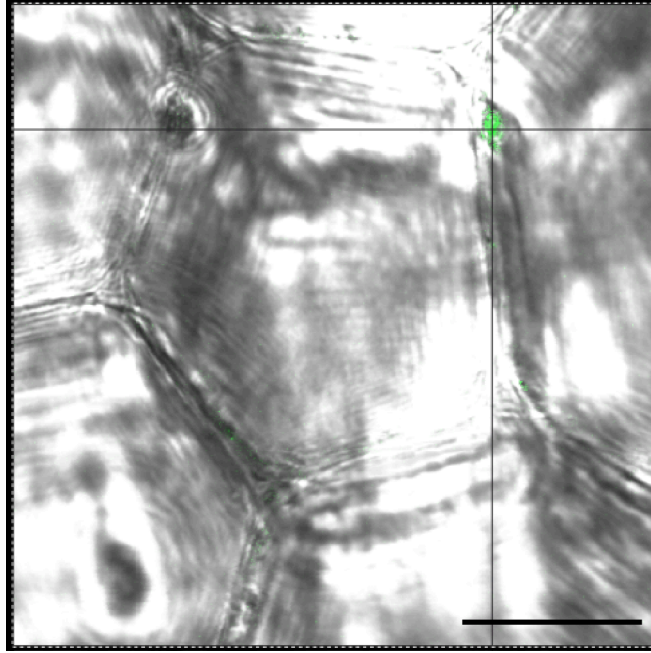

**Suppl. Fig. S2: Localization of fluorescently labeled *Herbaspirillum frisingense* in the apoplast between leaf cells.** Confocal picture of green fluorescent protein labeled *HSF30<sup>T</sup>* strain in distinct spots in the shoot of *Miscanthus sinensis*. Scale bar 50  $\mu\text{m}$ .

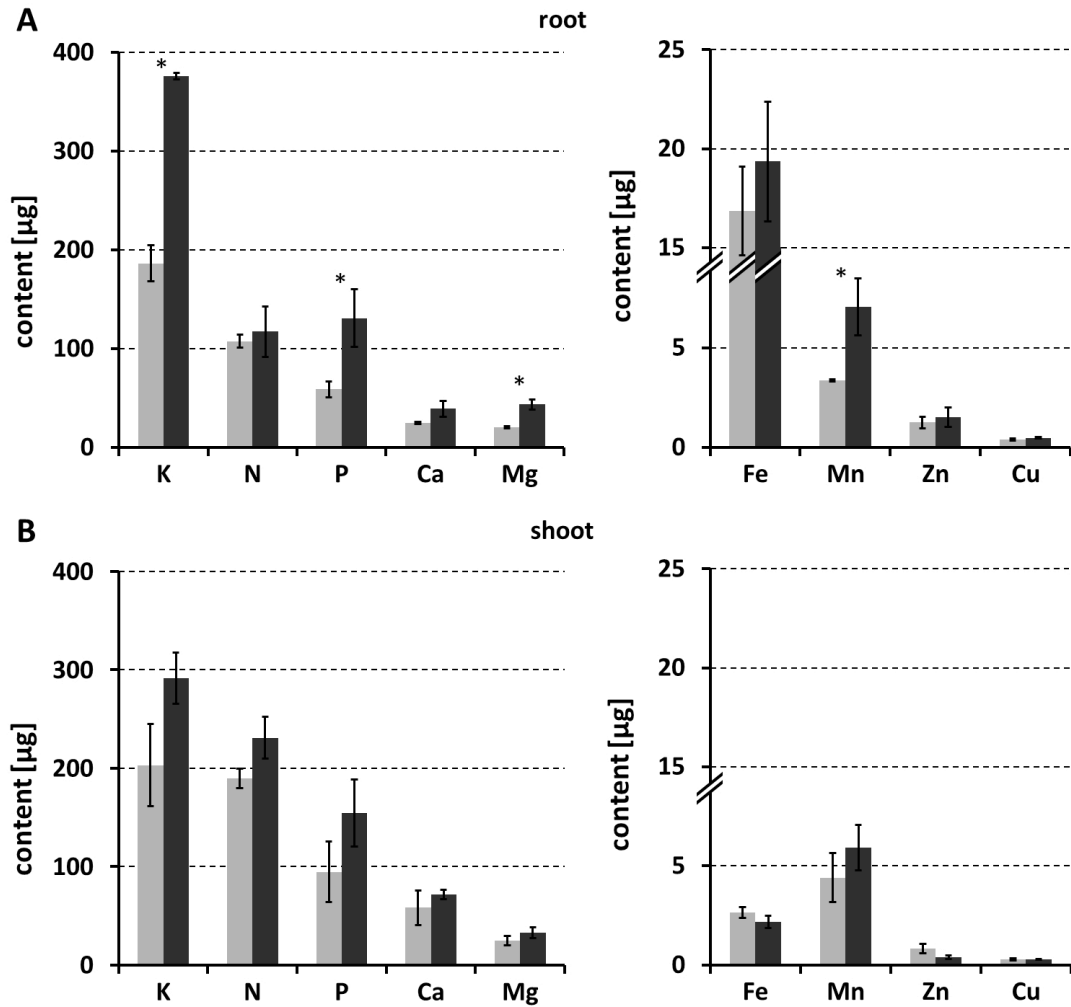

**Suppl. Fig. S3: Increases in nutrient content (=dry biomass x nutrient concentration) of roots (A) and shoots (B) by *H. frisingense* inoculation.** Macronutrient content (left) and micronutrient content (right) of control (grey bars) or inoculated (black bars) plant material. Significantly different content is given by an asterisk ( $p < 0.05$ ).

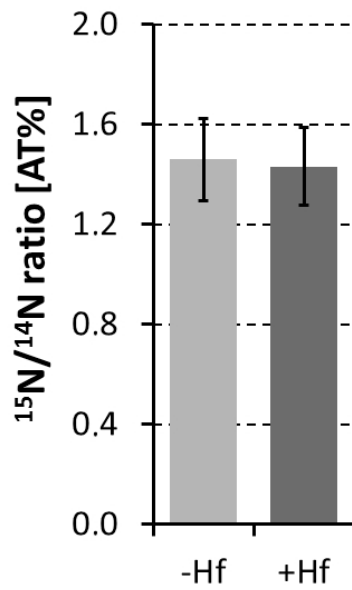

**Suppl. Fig. S4: Fertilization with  $^{15}\text{N}$ -enriched (10%) nutrient media did not reveal nitrogen fixation activities in *H. frisingense* inoculated plants.  $^{15}\text{N}/^{14}\text{N}$  ratios in total plant material after 3 weeks without *H. frisingense* (left) and with *H. frisingense* (right).**



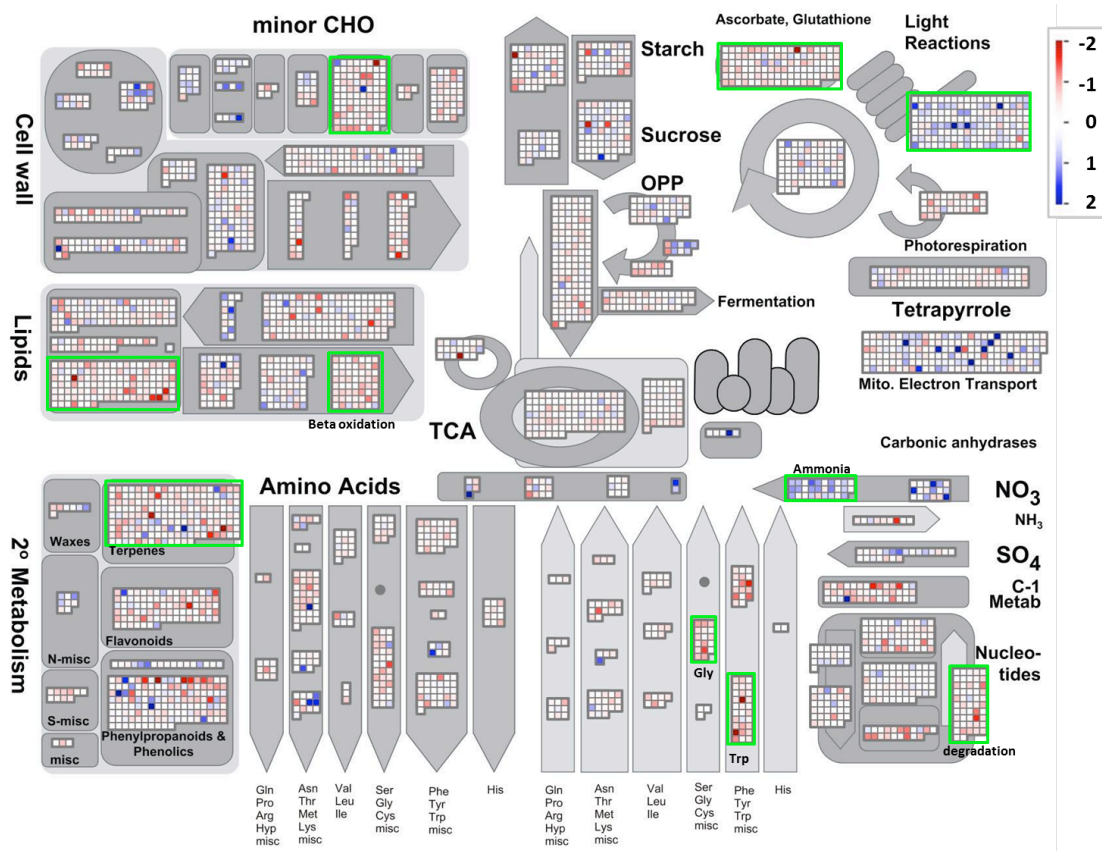

**Suppl. Fig. S5: Transcriptome overview of *M. sinensis* grown 3 hours with *H. frisingense*.** Higher expression in *M. sinensis* with *H. frisingense* is indicated by blue color and lower expression by red color. Logarithmic scale with white color is indicating similar expression level. Green squares around pathways indicates significant pathway regulation at  $P < 0.001$  by the Wilcoxon Rank Sum test, template from MAPMAN.

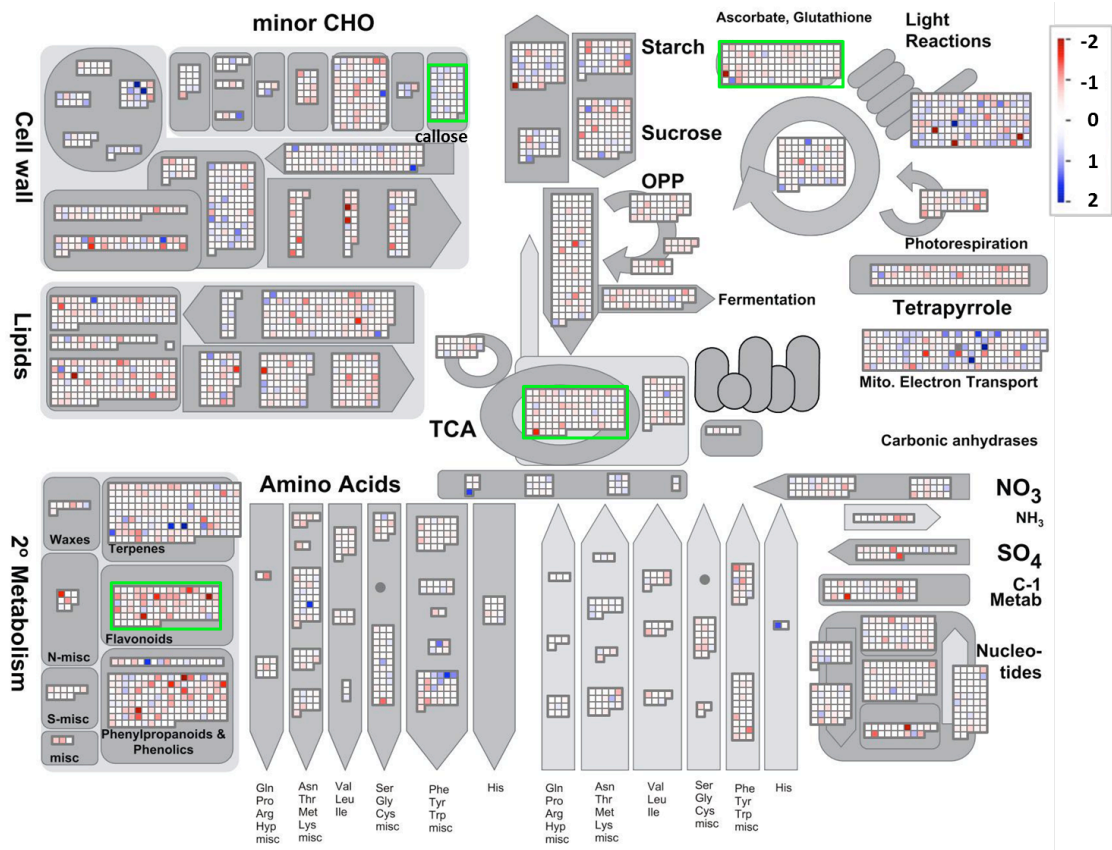

**Suppl. Fig. S6: Transcriptome overview of *M. sinensis* grown 3 weeks with *H. frisingense*.** Higher expression in *M. sinensis* with *H. frisingense* is indicated by blue color and lower expression by red color. Logarithmic scale with white color is indicating similar expression level. Green squares around pathways indicates significant pathway regulation at  $P < 0.003$  by the Wilcoxon Rank Sum test, template from MAPMAN.

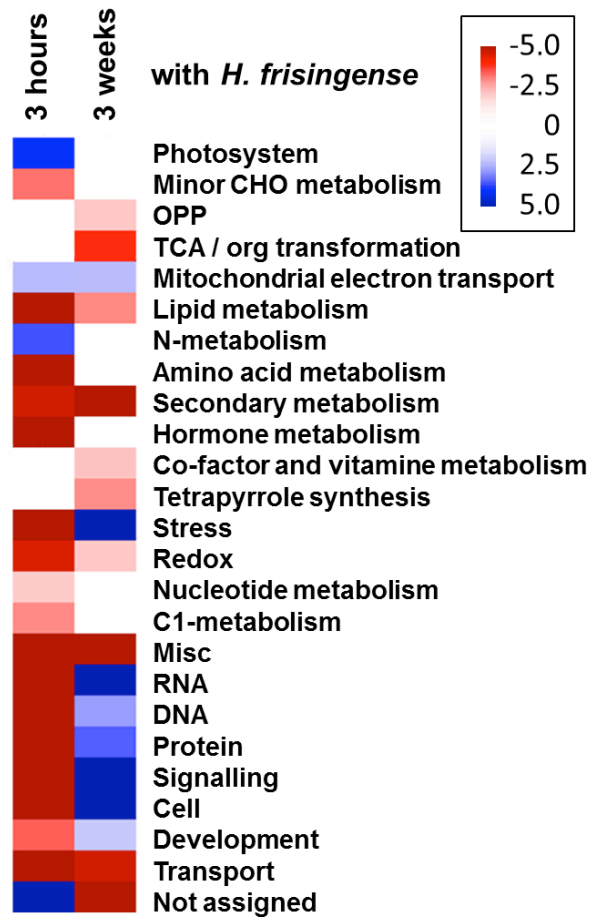

**Suppl. Fig. S7: Transcriptional categories affected by inoculation of *M. sinensis* grown with *H. frisingense*.** Significantly higher expression (z-score  $>1.96$ ;  $\approx P < 0.05$ ) is indicated by blue color, lower expression (z-score  $<-1.96$ ;  $\approx P < 0.05$ ) by red color (Bin-wise Wilcoxon test) and non-significant differences (z-score  $<1.96$ ) are shown in white. *M. sinensis* grown 3 hours (left) or 3 weeks (right) with *H. frisingense* compared to non-inoculated plants.

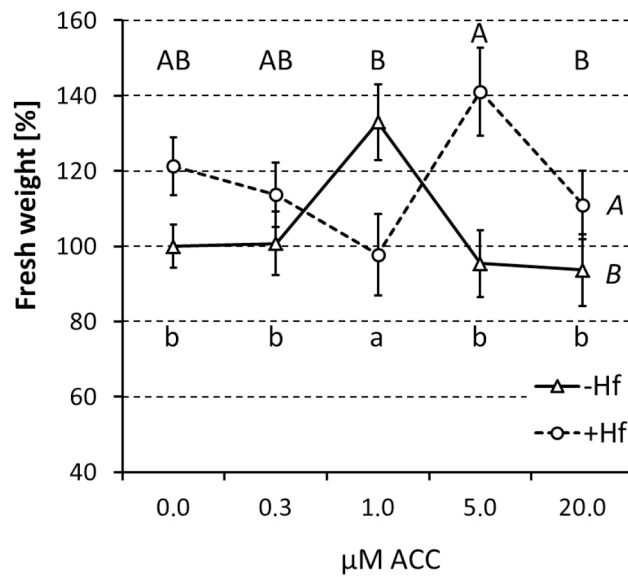

**Suppl. Fig. S8: Influence of ethylene in growth promotion of *Miscanthus sinensis* by *H. frisingense*.** Increased biomass (fresh weight in % to -Hf ,  $\pm$  SE, two replicates) with *H. frisingense* inoculation (12-14 plants) under low nitrogen with different concentrations of ACC (1-aminocyclopropane-1-carboxylic acid). Lower case letters indicate whether statistical differences were observed within the -Hf treatment, capital letters indicate statistical differences in the +Hf experiments. Capital italic letters indicate statistical differences between all -Hf and +Hf treatments (two-way ANOVA test,  $P < 0.05$ ).

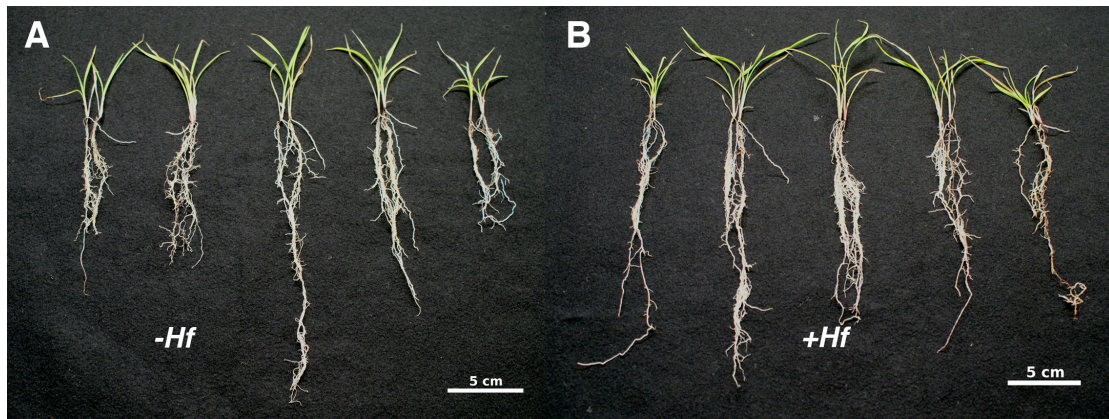

**Suppl. Fig. S9: Effect of increasing ACC concentrations and *H. frisingense* on plant growth.** Plants grown without *H. frisingense* (left) and with *H. frisingense* (right). Two plants for each treatment are shown. Increasing ACC concentrations in watering solution (in  $\mu\text{M}$ ) from left to right: 0, 0.3, 1, 5, 20.



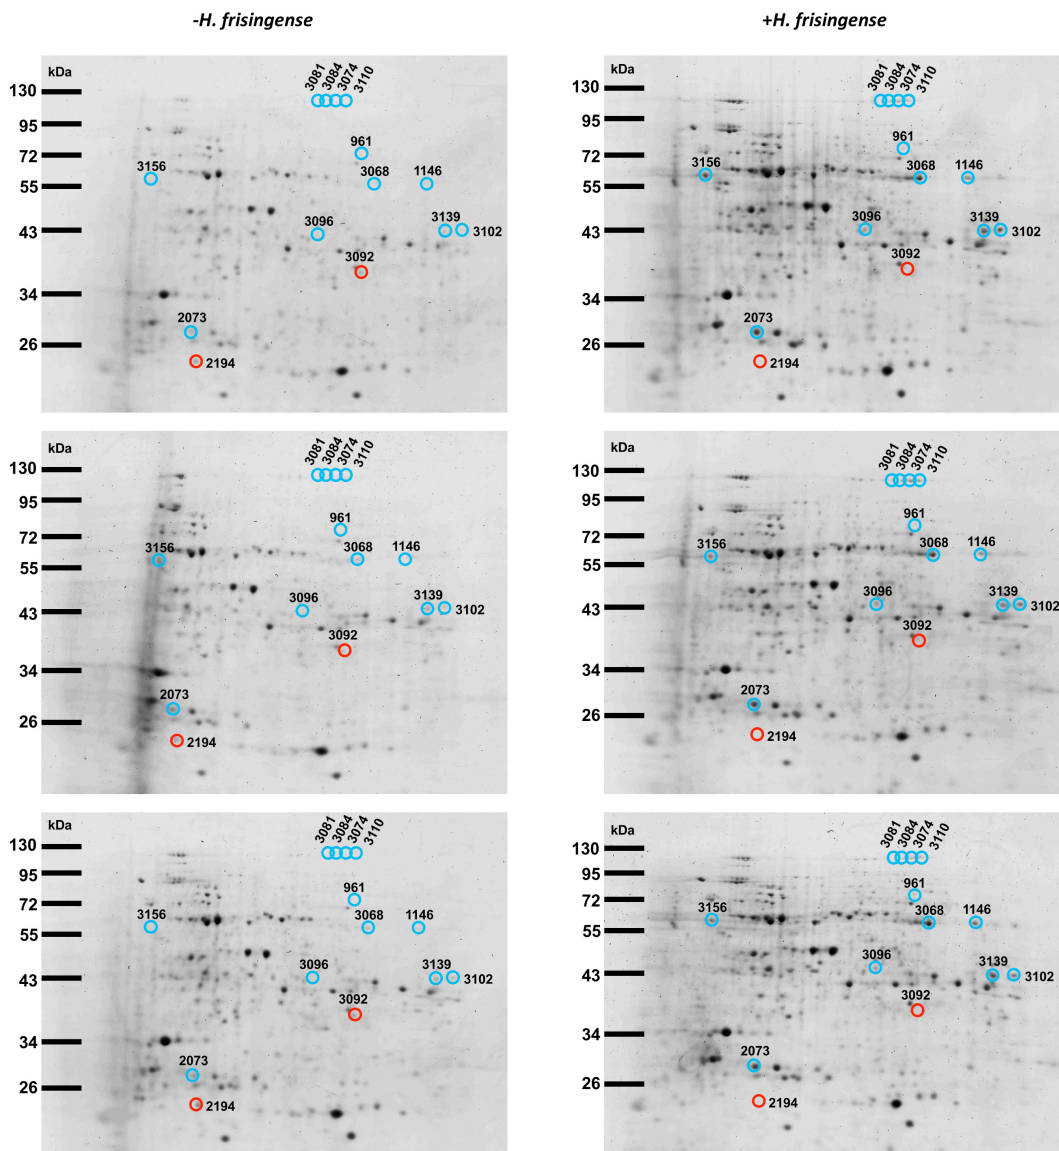

Suppl. Fig. S10: 2D gel electrophoresis of *M. sinensis* grown 3 weeks without (left) or with (right) *H. frisingense*. Protein spots significantly different compared to non-inoculated plants are indicated by circles. Blue color indicates significantly ( $p < 0.05$ ,  $> 1.8$ -fold) more abundant protein spots after three weeks with *H. frisingense*, red color indicates lower abundance with *H. frisingense*. The underlying protein in a few differential protein spots

could not be unambiguously identified, in these cases the spots were neglected from further analysis.

| Annotation    | Primer sequence       |                          | Product length [bp] |
|---------------|-----------------------|--------------------------|---------------------|
|               | forward               | reverse                  |                     |
| PP2AA2        | TGTTGAAGGTTGTGCTGCTC  | GCGACCATATAACGAACACG     | 120                 |
| Actin 1       | AGTTTCTGGGGAAGTTCGAC  | GGTAACGAATCGGAGTCACTG    | 147                 |
| DnaJ Protein  | TGTGGTTCATCCTCTGAAGG  | ACCCTTACCATTGCACTTCG     | 106                 |
| BGAF-1        | AAAGGTCGCGCAAAGGAG    | CACACACTGGTTTGCTTTCC     | 93                  |
| BGAF-2        | CCCGCAAATAGAGTCAATG   | TTGTAACCTCAAAGAGCAGTGAGC | 147                 |
| dirigent-like | GATGGGGACTTTTCCGATTAC | GCTCGCATCAACAGTGTACTTG   | 100                 |
| ARF1          | ATTAGCCCACGGAGATGTTG  | TGAGGGTGATGAATCTCCTG     | 91                  |
| ARF6          | CGTTCTGTGAAGTTGGTTG   | AAAGGCAGTTGGGTACATCG     | 111                 |
| IAA18         | TCTTCGACGGCAGATGAAAG  | TAAGCAATCCCCTGAGCAAC     | 165                 |
| IAA20         | CGTGAACGATGTTTCTGTCC  | CGAAACCCTAACTTGACACG     | 146                 |
| EIN3          | GTTGAAACCAGAACC GAACC | TGAGGGTTTCTTTGGACAGG     | 184                 |
| ETR1          | GGCCCTTTCCAGAAGATTTG  | CCGGAGATTTGCATTTGG       | 133                 |
| SCER1a        | TCTCAATCCCTTTGGAGCTG  | TTTGCCACTGTCAACACCAC     | 175                 |
| SCER1b        | ATCAGCTCCAAAGGGATGAG  | TGCAGCATCTCGATTAGTGC     | 153                 |
| SCERF1        | AAGGCCAAGGTCAACTTCC   | CCATAGTTTCAGGCTTCACG     | 175                 |

**Suppl. Table 1: Used primers and predicted PCR fragment length.**

### Supplementary material and methods

*Polymerase chain reaction* -- Plant samples were entire control plants or inoculated plants separated in shoot and root. DNA was extracted from 100mg frozen plant material, resuspended in 200 µl water and 1 µl was used in the PCR. The final PCR mix (50µl per sample) contained 1x Buffer, 200 nM each dNTP, 200 nM each Primer (Actin-4: Act4 fw TGCTGGTTCGGGACCTCACGG, Act4 rv TGCTGCTTGGTGCAAGGGAAGT; NifA fw TCACTGCCACCAACCGCGAC, NifA rv CGGCACGACCACGACTGCTT) and 1 U Taq Polymerase. The lid-heated (104°C) PCR-Cycler (T3, Biometra) was programmed for 4 min 94°C initial denaturation, followed by 35 cycles 94°C 30 sec, 57°C 30 sec, 72°C 45 sec, and a final extension for 10 min at 72°C. An aliquot of the PCR was loaded on a Gel (1% Agarose in

TAE-Buffer), 8V/cm was applied 45 min and stained in Ethidium-Bromide.
